# Supplementary material for: Selective and visual detection of a nerve agent mimic by phosphorylation and protonation of quinolin oximes
Source: Royal Society of Chemistry journal article supplement (doi:10.1039/c7tc02617j), 2017-01-01

Electronic Supplementary Information (ESI) for

# Selective and visual detection of a nerve agent mimic by phosphorylation and protonation of quinolin oximes

Yuan-Chao Cai, Chen Li and Qin-Hua Song\*

*Department of Chemistry, University of Science and Technology of China, Hefei 230026, China*

*E-mail address: qhsong@ustc.edu.cn (Q.-H. Song)*

## Contents

|                                                                              |    |
|------------------------------------------------------------------------------|----|
| I. UV/Vis absorption and fluorescence spectra of three sensors.....          | S2 |
| II. Spectral response of the sensors to different concentration of DCP ..... | S3 |
| III. HRMS evidence of the sensing mechanism of NA-p3 .....                   | S4 |
| IV. Measurements of pKa values .....                                         | S5 |
| V. Effects of water on the sensing performance of NA-p3 .....                | S6 |
| VI. Experiments for the selectivity of the sensors .....                     | S7 |
| VII. Copies of NMR spectra of relevant compounds.....                        | S8 |

## II. UV/Vis absorption and fluorescence spectra of three sensors

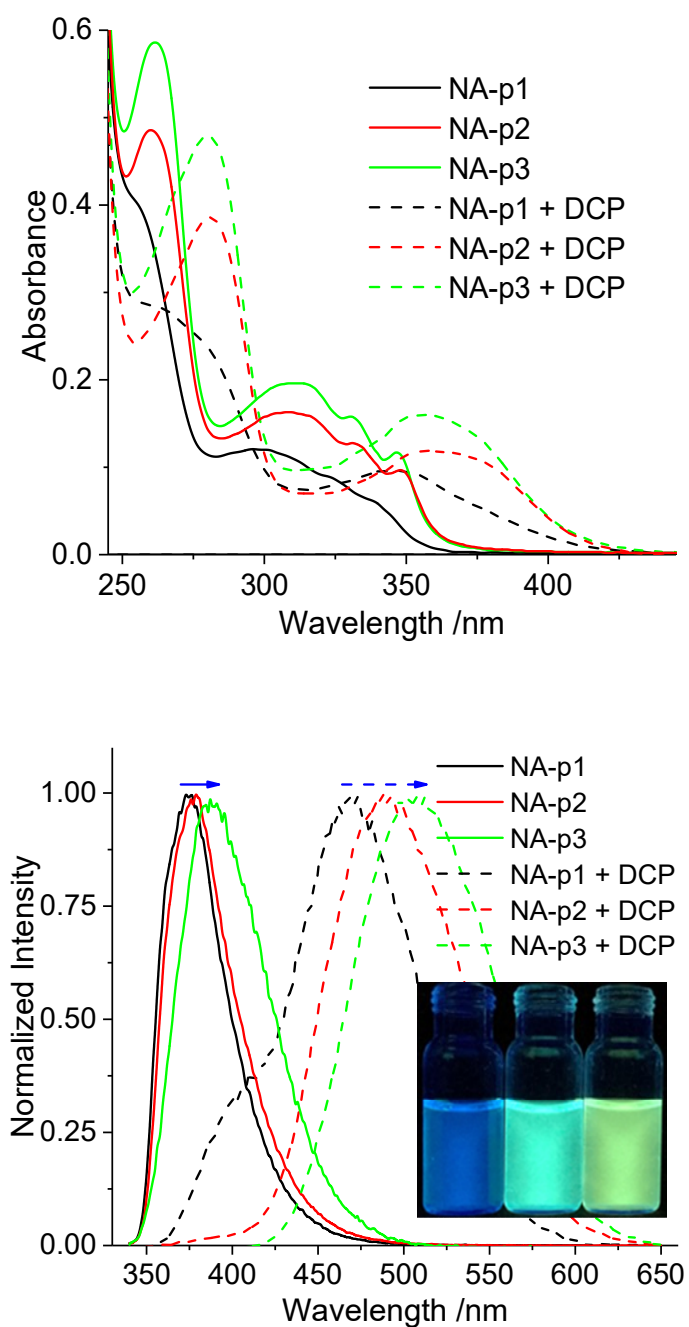

**Fig. S1** Absorbance (left) and normalized fluorescent (right) spectra of three probes (10  $\mu\text{M}$ ) in  $\text{CH}_3\text{CN}$  containing 1% DMSO before and after addition of the solution of DCP (5 equiv.) in  $\text{CH}_3\text{CN}$  ( $\lambda_{\text{ex}}=330$  nm).

## II. Spectral response of the sensors to different amounts of DCP

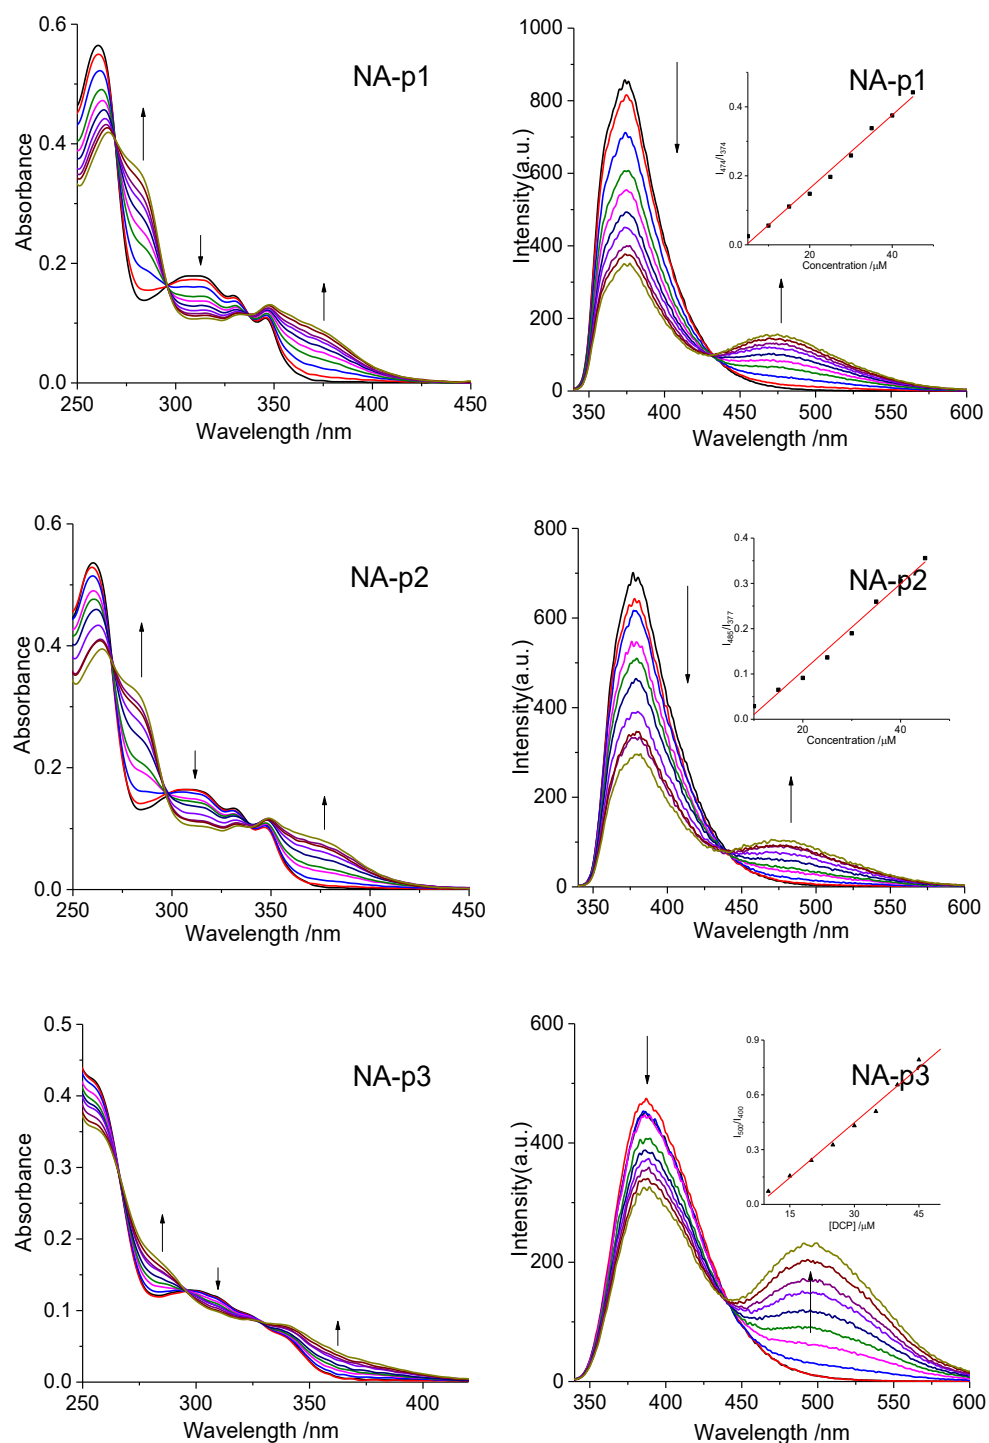

**Fig. S2** Absorbance (left) and fluorescence (middle) spectra of sensors (10  $\mu\text{M}$ ) upon gradual addition of a solution of DCP (0–4.5 equiv.) in  $\text{CH}_3\text{CN}$  containing 1% DMSO ( $\lambda_{\text{ex}}=330\text{ nm}$ ). Right: Linear correlation between fluorescent ratio of  $F_{500}/F_{400}$  and the concentration of DCP solutions.

### III. HRMS evidence of the sensing mechanism of NA-p3

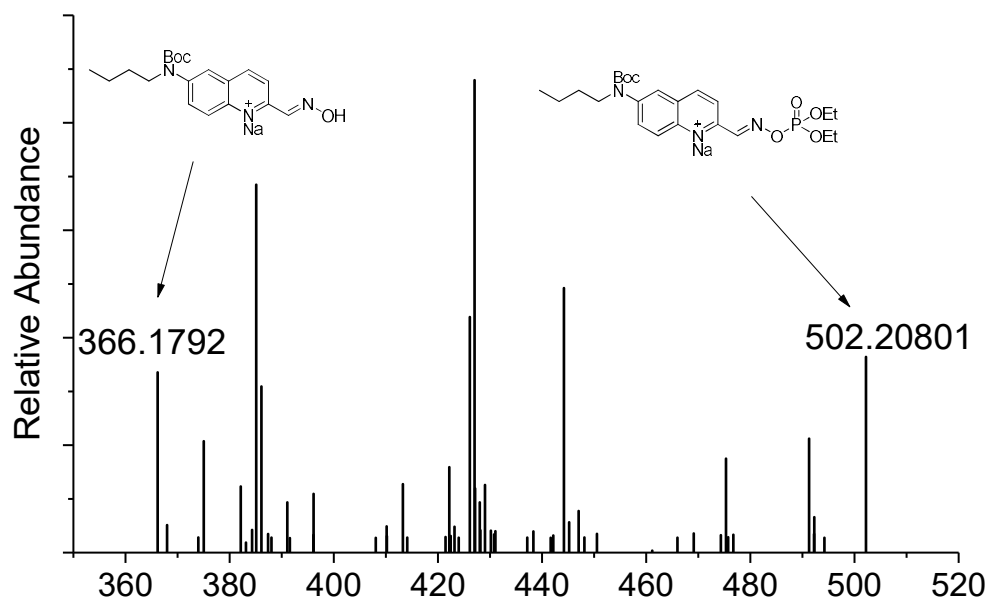

**Fig. S3** HRMS of the reaction mixture of NA-p3 with DCP in CH<sub>3</sub>CN

#### IV. Measurements of pKa values

The measurements of pK<sub>a</sub> were performed through recording UV/Vis absorption spectra of a sensor in aqueous solutions at different pH, which were DMSO/buffer (1:99 v/v) solvent mixtures, and four buffers over a pH range of 2.2-13.0, including 0.1 M citric acid-0.1 M Na<sub>2</sub>HPO<sub>4</sub> buffer for pH 2.2-8, 0.1 M KCl-0.1 M H<sub>3</sub>BO<sub>3</sub>-0.1 M NaOH buffer for pH 8-10, 0.1 M NaHCO<sub>3</sub>-0.1 M NaOH buffer for pH 10-11 and 0.1 M KCl-0.1 M NaOH buffer for pH 12-13.

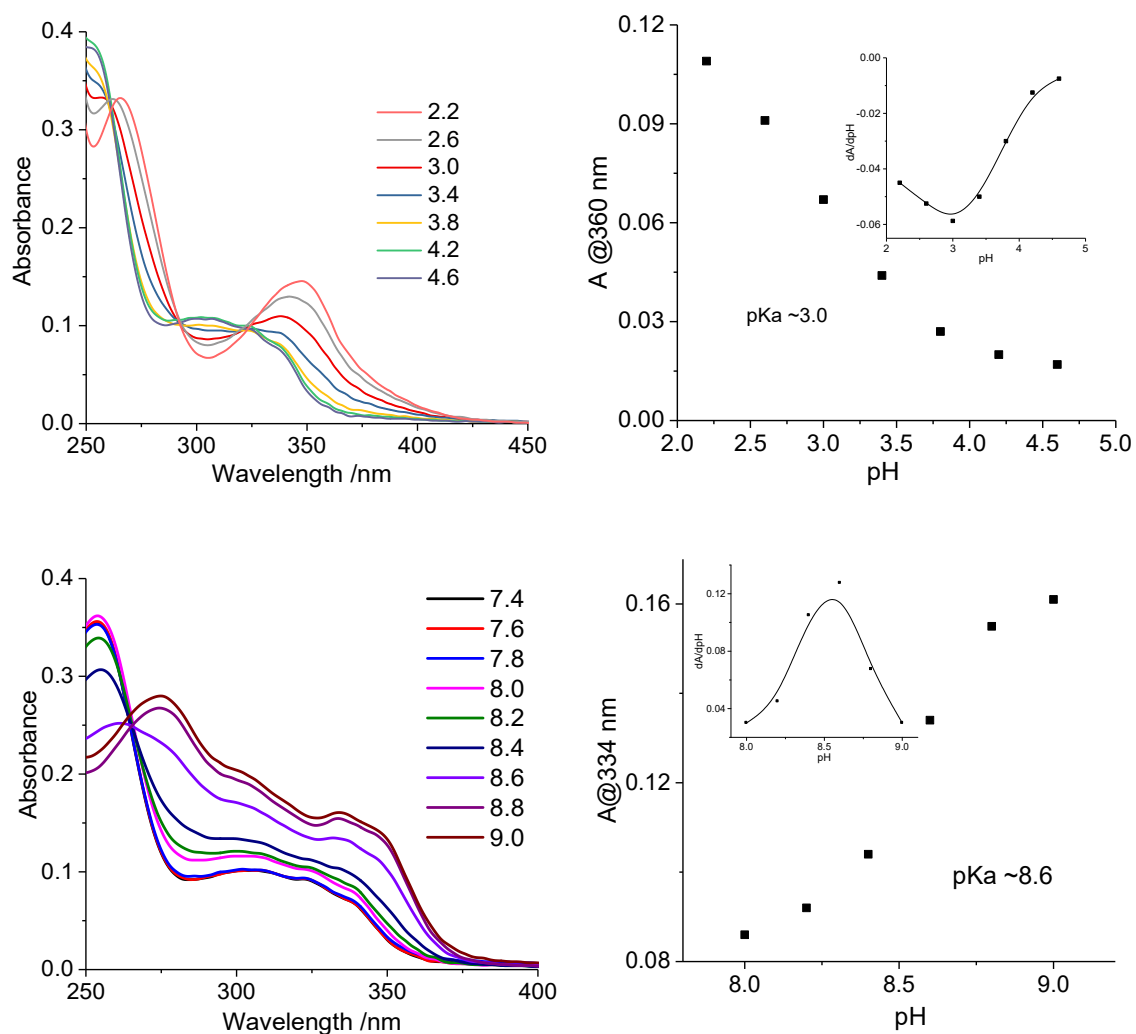

**Fig. S4** UV/Vis absorption spectra (left) in various pH solutions and plots of absorbance (right) of NA-p3 at certain wavelength vs. pH value.

## V. Effects of water on the sensing performance of NA-p3

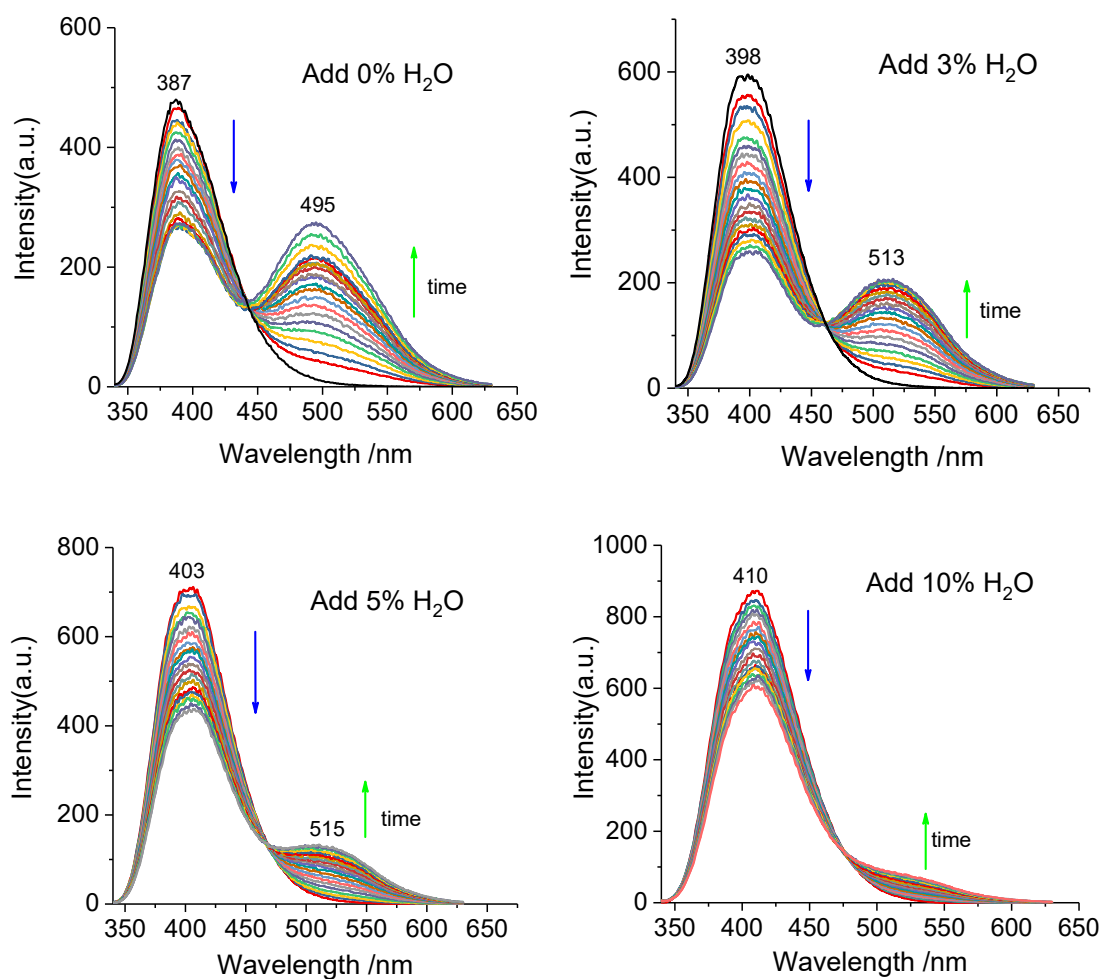

**Fig. S5** Time-dependent fluorescence spectra of 10  $\mu\text{M}$  NA-p3 after the addition of 5 equiv. DCP in acetonitrile solutions upon adding different amounts of water (0-10%), recorded once every minute for 20 min, excitation at 330 nm.

## VI. Experiments for the selectivity of the sensors

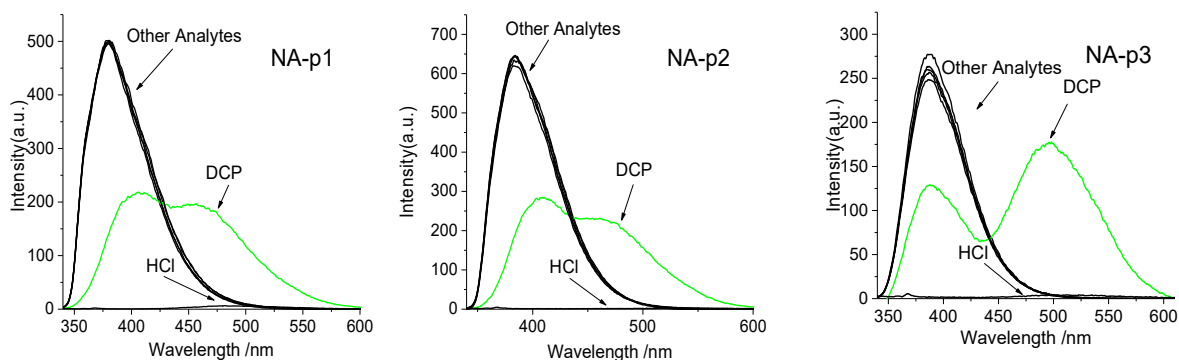

**Fig. S6a** Fluorescence intensity of the probe (10  $\mu$ M) upon addition of 4.5 equiv. of DCP or 100 equiv. of other analytes (DCNP, HAc, HCl, DMMP and TEP).

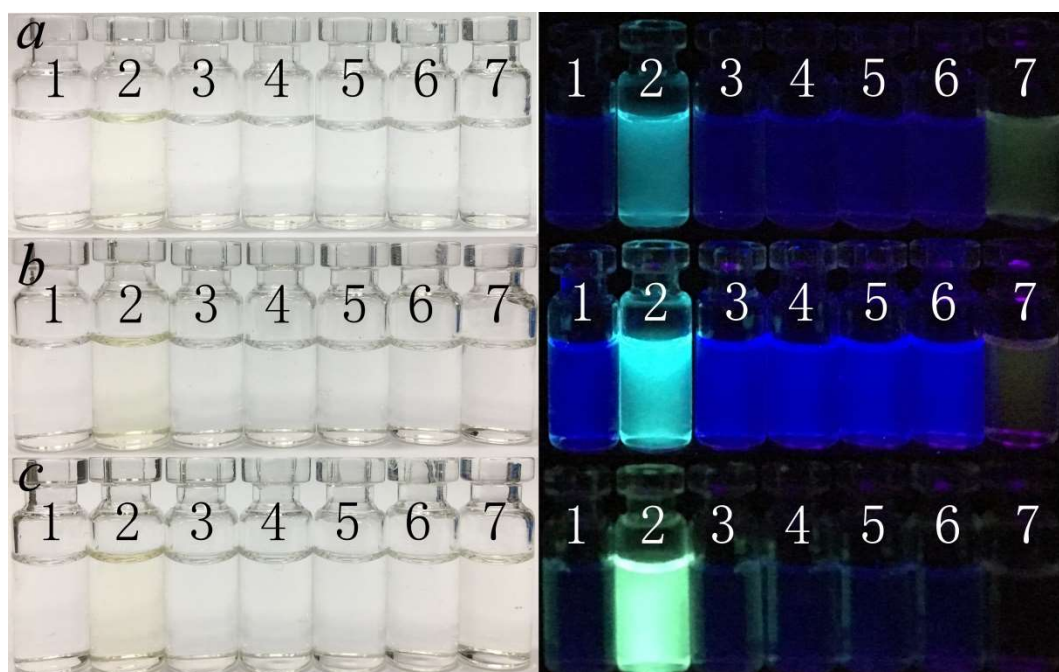

**Fig. S6b** Chromatic (left) and fluorescent (right) response of 20  $\mu$ M NA-p1 (a), NA-p2 (b) and NA-p3 (c) before (1) and after addition of 2: DCP (45  $\mu$ M), 3: DCNP (1 mM), 4: HAc (1 mM), 5: DMMP (1 mM), 6: TEP (1 mM) or 7: HCl (1 mM).

## VII. Copies of NMR spectra of relevant compounds

### Copies of NMR spectra of compound **2a**

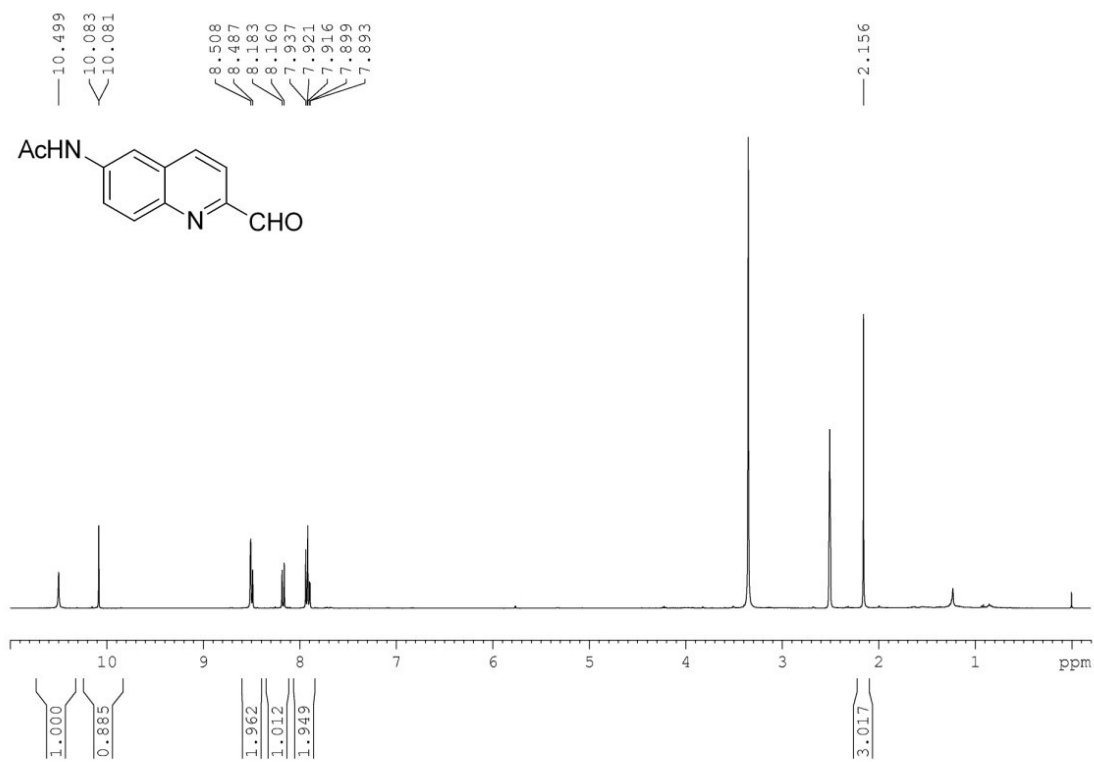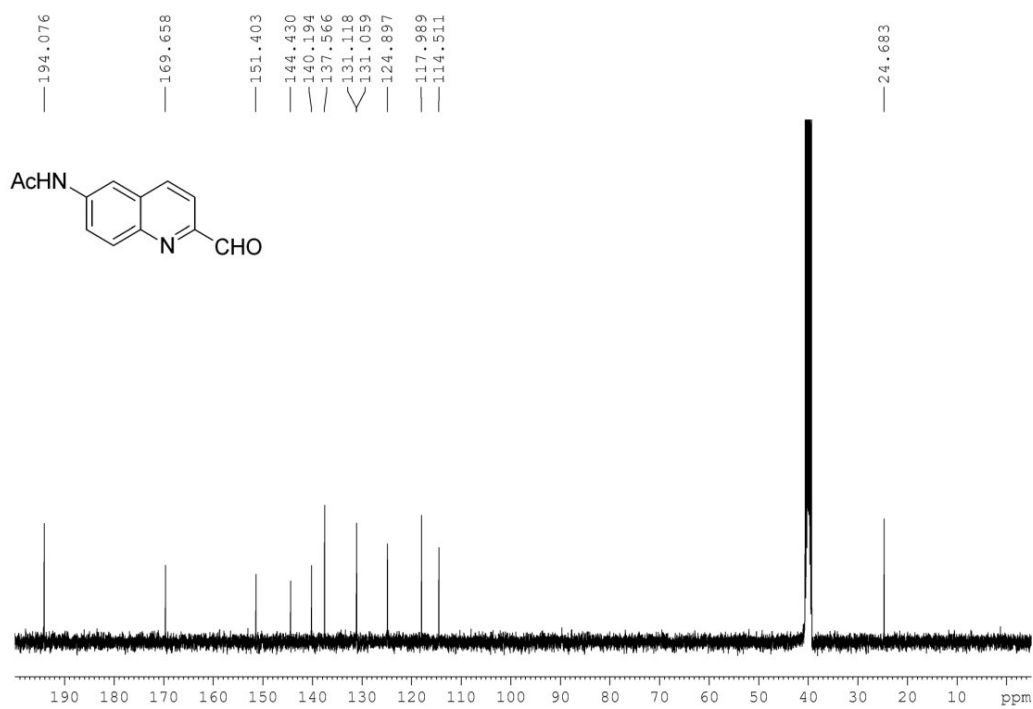



Copies of NMR spectra of compound **2c**

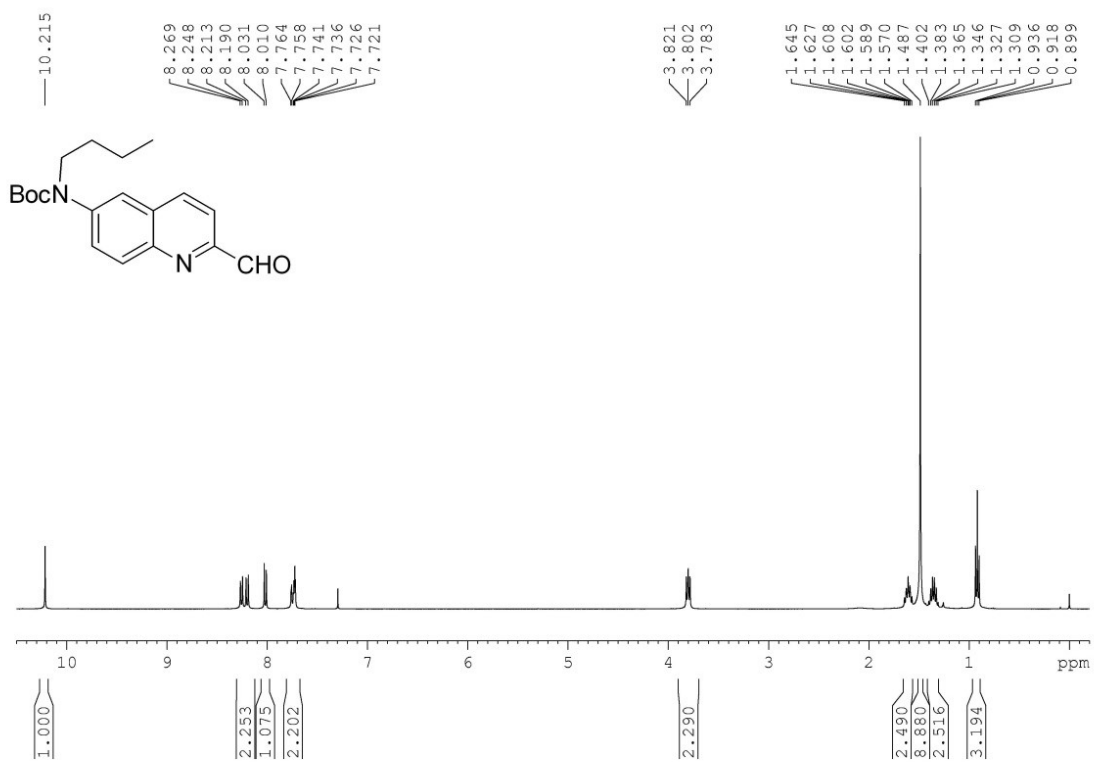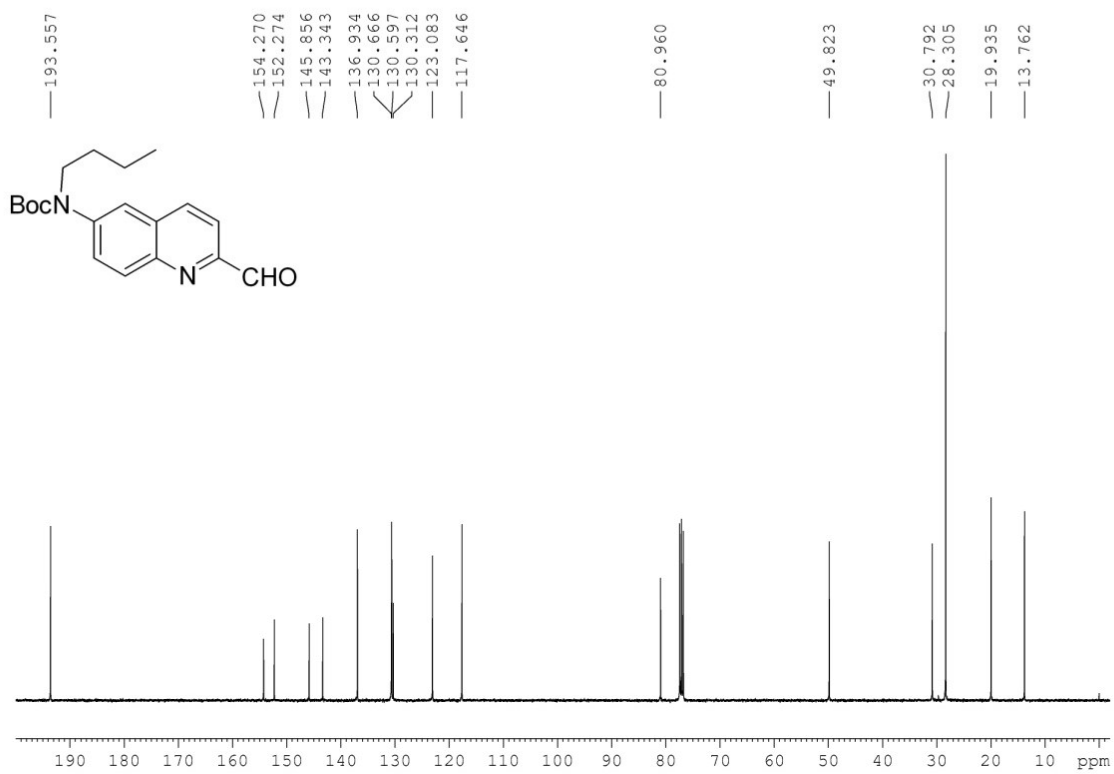

Copies of NMR spectra of NA-p1

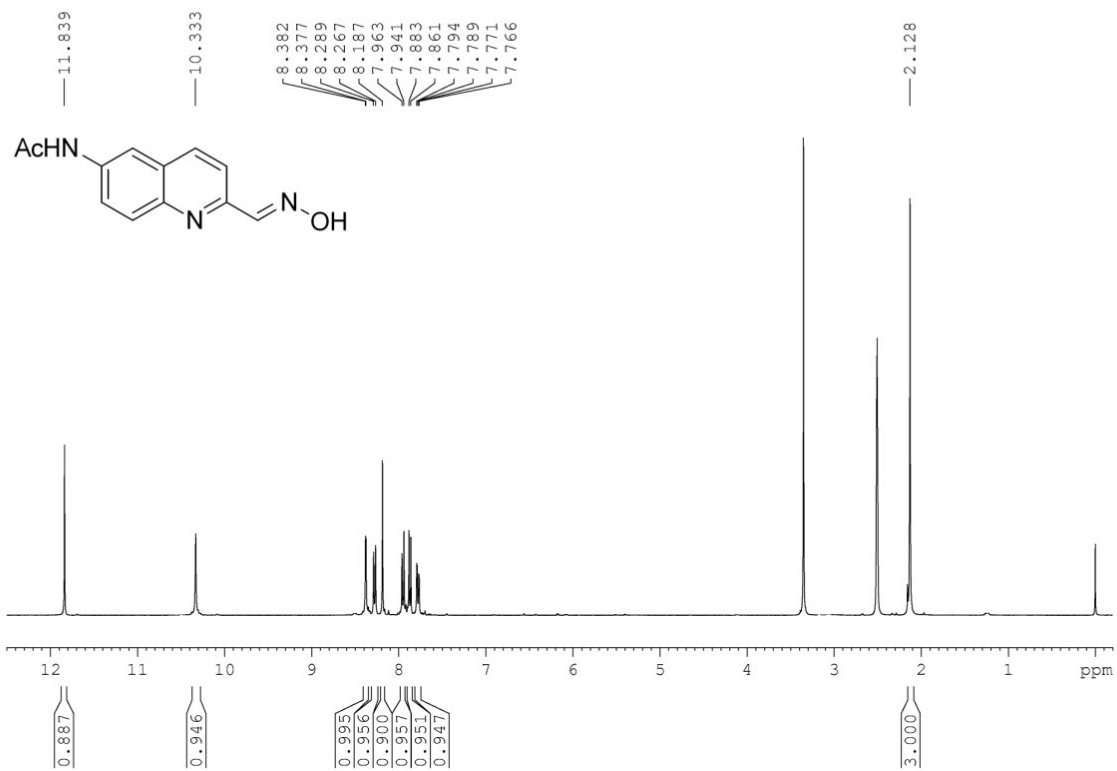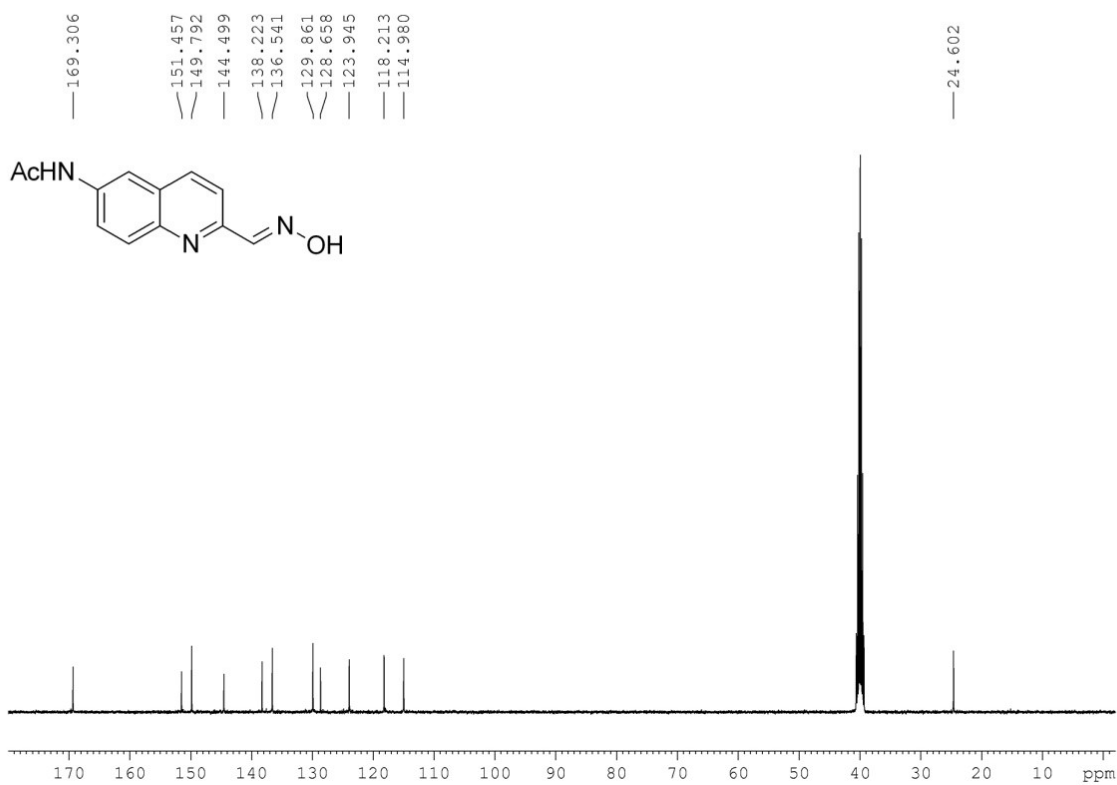

Copies of NMR spectra of NA-p2

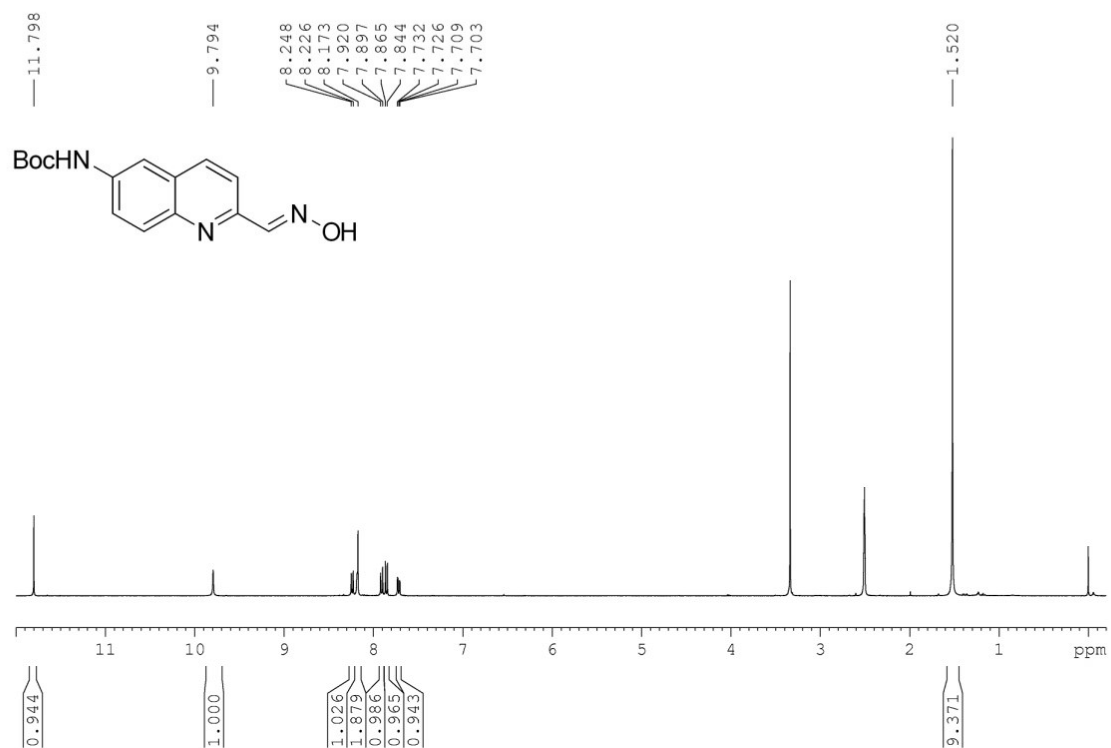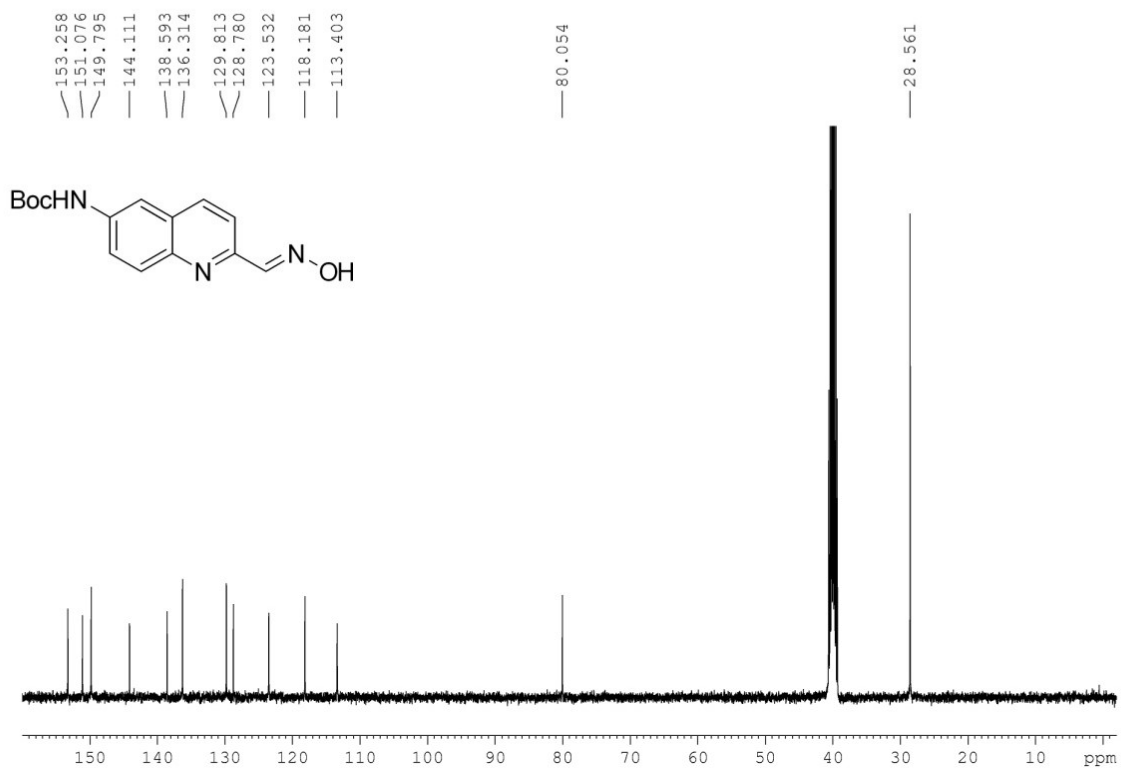

Copies of NMR spectra of NA-p3

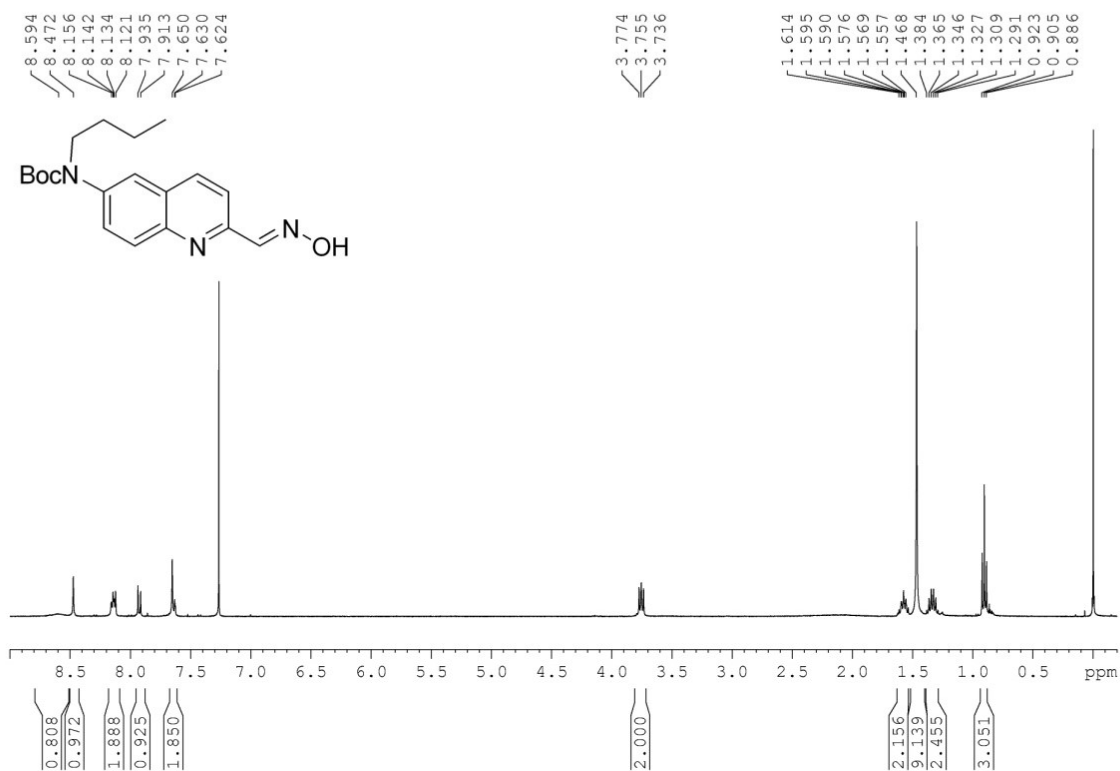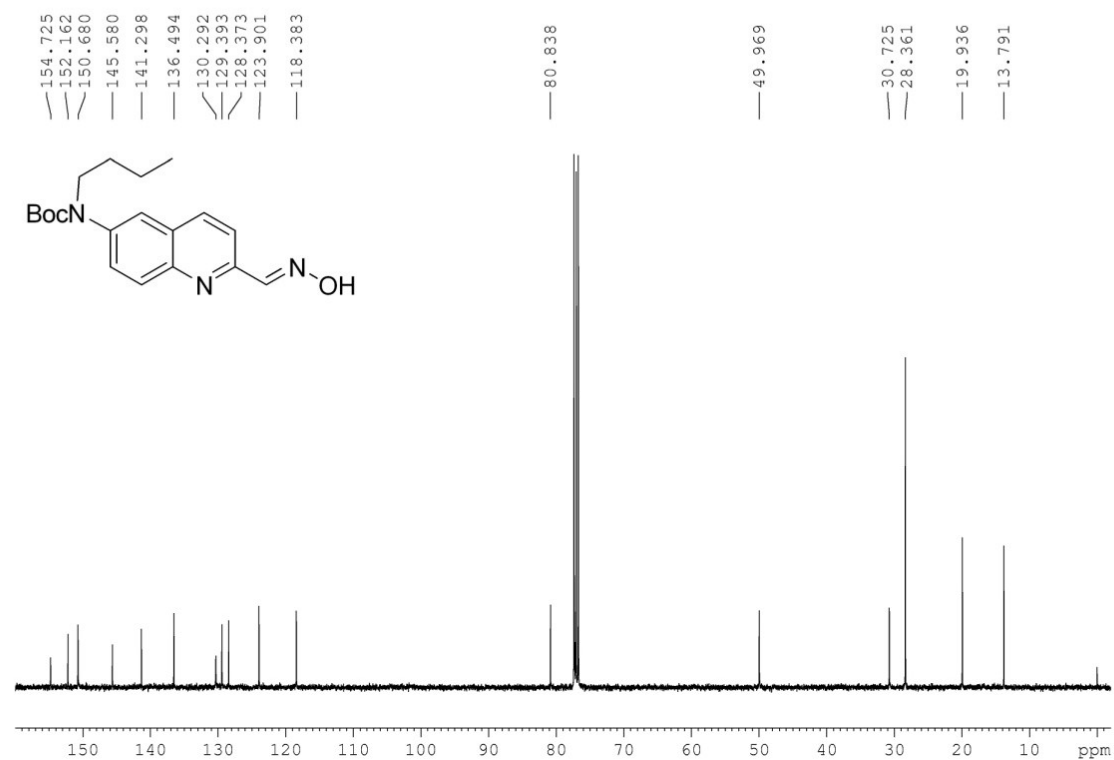

Supplement: c7tc02617j1.pdf [file c7tc02617j1.pdf]
